# Supplementary material
Source: PubMed Central journal article supplement (PMC9931930)
Supplement: NIHMS1822642-supplement-Appendix_1_Survey.pdf [file NIHMS1822642-supplement-Appendix_1_Survey.pdf]

## Hourly Neuroassessments in the Intensive Care Unit

\* 1. You are being invited to participate in a research study being conducted by Dr. Jamie LaBuzetta and her colleagues from the University of California - San Diego.

The purpose of this research study is to investigate attitudes towards hourly neuroassessments. If you agree to participate in this study, you will be asked to complete a short online questionnaire to help us better understand the reasons for ordering and barriers to performing hourly neuroassessments.

As an eligible participant, you will have the option of enrolling in a raffle to win one of four Amazon.com gift cards. Raffle winners will be chosen by a lottery system at the close of the survey, with no less than a 1 in 1000 chance of winning.

The survey is completely anonymous. Your participation in this study is completely voluntary; you can withdraw at any time by simply exiting the survey. Choosing not to participate or withdrawing will result in no penalty or loss of benefits to which you are entitled.

If you have questions about this project or if you have a research-related problem, you may contact Dr. LaBuzetta at 619-543-6222. If you have any questions concerning your rights, you may contact the UCSD Human Research Protections Program Office at 858-246-HRPP (858-246-4777).

By clicking "Agree to Participate" below, you are indicating that you:

- consent to participate in this anonymous survey;
- are at least 18 years of age;
- have taken care of at least one patient on whom hourly neuroassessments were ordered.

If any of the above statements is not true, please click "Decline to Participate".

Agree to Participate

Decline to Participate

## Hourly Neuroassessments in the Intensive Care Unit

\* 2. What is your role as a healthcare provider?

## Hourly Neuroassessments in the Intensive Care Unit

\* 3. What is your level of training?

## Hourly Neuroassessments in the Intensive Care Unit

\* 4. What is your PGY level?

PGY-2

PGY-3

PGY-4

PGY-5

PGY-6

PGY-7

PGY-8

## Hourly Neuroassessments in the Intensive Care Unit

\* 5. Since completing your training, how many years have you been practicing as an APP or attending physician?

- Fewer than 2 years
- 2 - 5 years
- 5 - 10 years
- More than 10 years

Hourly Neuroassessments in the Intensive Care Unit

\* 6. My (sub)specialty can best be described as:

- Neurocritical Care
- Pulmonary Critical Care
- Anesthesia Critical Care
- Neurosurgery
- Internal Medicine
- Neurology (including stroke)
- Trauma and/or Acute Surgical Care
- Anesthesia and/or Post-Anesthesia Care Unit (PACU)
- Other (please specify)
- Vascular surgery
- Head and Neck (ENT) surgery
- Emergency Medicine
- Transplant Surgery and/or Medicine
- Cardiology
- Cardiothoracic Surgery
- Surgical Critical Care (NOT trauma)

## Hourly Neuroassessments in the Intensive Care Unit

\* 7. Approximately how many years have you been practicing as an RN since completing your training?

- Fewer than 2 years
- 2 - 5 years
- 5 - 10 years
- More than 10 years

\* 8. I work primarily in the:

- Neurocritical care ICU (NCCU)
- Medical ICU (e.g. MICU)
- Surgical ICU (SICU)
- Cardiac ICU (e.g. CVC ICU)
- Emergency Department
- Other (please specify)
- Post-Anesthesia Care Unit (PACU)
- Intermediate Monitoring Unit (IMU)
- Epilepsy Monitoring Unit (EMU)
- I'm best described as a traveling nurse

\* 9. My shifts are primarily:

- Day shifts
- Night shifts
- Both day and night shifts in approximately equal proportion

## Hourly Neuroassessments in the Intensive Care Unit

\* 10. Which is your primary role in neuroassessments?

- I primarily order neuroassessments.
- I primarily perform neuroassessments.





\* 15. On a scale of 1 (much less willing) to 5 (much more willing), which of the following factors impact your **willingness to discontinue** hourly (Q1) neuroassessments following acute brain injury?

|                                                                            | 1 (much <u>less</u> willing) | 2 (slightly <u>less</u> willing) | 3 (no change)         | 4 (slightly <u>more</u> willing) | 5 (much <u>more</u> willing) |
|----------------------------------------------------------------------------|------------------------------|----------------------------------|-----------------------|----------------------------------|------------------------------|
| Patient scores positive on delirium assessments (e.g. CAM-ICU).            | <input type="radio"/>        | <input type="radio"/>            | <input type="radio"/> | <input type="radio"/>            | <input type="radio"/>        |
| Patient is very old (>90 years old).                                       | <input type="radio"/>        | <input type="radio"/>            | <input type="radio"/> | <input type="radio"/>            | <input type="radio"/>        |
| Patient is old (>65 years old).                                            | <input type="radio"/>        | <input type="radio"/>            | <input type="radio"/> | <input type="radio"/>            | <input type="radio"/>        |
| Patient is English speaking.                                               | <input type="radio"/>        | <input type="radio"/>            | <input type="radio"/> | <input type="radio"/>            | <input type="radio"/>        |
| Patient is non-English speaking.                                           | <input type="radio"/>        | <input type="radio"/>            | <input type="radio"/> | <input type="radio"/>            | <input type="radio"/>        |
| Patient is verbally or physically aggressive.                              | <input type="radio"/>        | <input type="radio"/>            | <input type="radio"/> | <input type="radio"/>            | <input type="radio"/>        |
| Patient is aphasic.                                                        | <input type="radio"/>        | <input type="radio"/>            | <input type="radio"/> | <input type="radio"/>            | <input type="radio"/>        |
| The patient is non-compliant or expresses annoyance with neuroassessments. | <input type="radio"/>        | <input type="radio"/>            | <input type="radio"/> | <input type="radio"/>            | <input type="radio"/>        |
| Patient code status is Do Not Attempt Resuscitation.                       | <input type="radio"/>        | <input type="radio"/>            | <input type="radio"/> | <input type="radio"/>            | <input type="radio"/>        |
| Patient transition in goals of care to focus on comfort.                   | <input type="radio"/>        | <input type="radio"/>            | <input type="radio"/> | <input type="radio"/>            | <input type="radio"/>        |

\* 16. What percentage of the time do you order hourly (Q1) neuroassessments on your patients with acute brain injury (including intracranial surgeries)?

0% 100%

\* 17. On average, what is the length of time (in days) that you maintain patients with acute brain injury on hourly (Q1) neuroassessments?

1 day 10 days or more

\* 18. Approximately how many bedside nursing neuroassessments (hourly or otherwise) have you personally observed?

0 20 or more

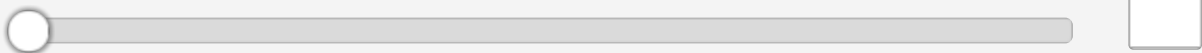

A horizontal slider control is shown. It consists of a light gray bar with a circular knob at the left end and a square button at the right end. The knob is currently positioned at the far left, corresponding to the value '0'. The bar is labeled '0' at the left and '20 or more' at the right.

## Hourly Neuroassessments in the Intensive Care Unit

\* 19. Please indicate the degree to which you agree or disagree with the following statements on a scale from 1 (strongly disagree) to 5 (strongly agree):

|                                                                                                                                                       | 1 = Strongly Disagree | 2 = Disagree          | 3 = Neither Agree nor Disagree | 4 = Agree             | 5 = Strongly Agree    |
|-------------------------------------------------------------------------------------------------------------------------------------------------------|-----------------------|-----------------------|--------------------------------|-----------------------|-----------------------|
| Guidelines outlining care for acutely brain injured patients recommend "frequent neuroassessments". I interpret this to mean hourly neuroassessments. | <input type="radio"/> | <input type="radio"/> | <input type="radio"/>          | <input type="radio"/> | <input type="radio"/> |
| It is important for Guideline recommendations to specify a <i>frequency</i> for neuroassessments following acute brain injury.                        | <input type="radio"/> | <input type="radio"/> | <input type="radio"/>          | <input type="radio"/> | <input type="radio"/> |
| It is important for Guideline recommendations to suggest a <i>duration</i> for frequent neuroassessments following acute brain injury.                | <input type="radio"/> | <input type="radio"/> | <input type="radio"/>          | <input type="radio"/> | <input type="radio"/> |
| Hourly neuroassessments are <i>valuable</i> in the care of patients with acute brain injury.                                                          | <input type="radio"/> | <input type="radio"/> | <input type="radio"/>          | <input type="radio"/> | <input type="radio"/> |
| Hourly neuroassessments are <i>necessary</i> for patients with acute brain injury.                                                                    | <input type="radio"/> | <input type="radio"/> | <input type="radio"/>          | <input type="radio"/> | <input type="radio"/> |
| Hourly neuroassessments can be detrimental to patients with acute brain injury.                                                                       | <input type="radio"/> | <input type="radio"/> | <input type="radio"/>          | <input type="radio"/> | <input type="radio"/> |
| There should be a maximum amount of time that someone is continuously monitored with hourly neuroassessments.                                         | <input type="radio"/> | <input type="radio"/> | <input type="radio"/>          | <input type="radio"/> | <input type="radio"/> |
| I am comfortable spacing neuroassessments less frequently than hourly following acute brain injury.                                                   | <input type="radio"/> | <input type="radio"/> | <input type="radio"/>          | <input type="radio"/> | <input type="radio"/> |

1 = Strongly  
Disagree

2 = Disagree

3 = Neither Agree  
nor Disagree

4 = Agree

5 = Strongly Agree

If I had another way to monitor my patients' neurological status continuously following acute brain injury, I would not order hourly neuroassessments.

If I had acute brain injury, I would want hourly neuroassessments performed on me for fewer than 24 hours.

20. How frequently do you think the majority of patients with acute brain injury should receive neuroassessments?

Every 30 minutes

Every 4 hours (Q4)

Every hour (Q1)

Every 6 hours (Q6)

Every 2 hours (Q2)

Less frequently than every 6 hours

Every 3 hours (Q3)

21. Please leave any additional comments below:



## Hourly Neuroassessments in the Intensive Care Unit

\* 24. On a scale from 1 (makes it much easier) to 5 (makes it much harder), please indicate the degree to which the following patient-related factors impact the **difficulty** of obtaining relevant clinical information during hourly (Q1) neuroassessments:

|                                                                 | 1 = Much easier       | 2 = Easier            | 3 = No impact         | 4 = Harder            | 5 = Much harder       |
|-----------------------------------------------------------------|-----------------------|-----------------------|-----------------------|-----------------------|-----------------------|
| Patient is old (>65 years old).                                 | <input type="radio"/> |
| I don't speak the patient's primary language.                   | <input type="radio"/> |
| Patient scores positive on delirium assessments (e.g. CAM-ICU). | <input type="radio"/> |
| Patient is aphasic.                                             | <input type="radio"/> |
| Patient is physically or verbally aggressive.                   | <input type="radio"/> |
| The patient is non-compliant or expresses annoyance.            | <input type="radio"/> |

\* 25. On a scale from 1 (much less willing) to 5 (much more willing), please indicate the degree to which the following patient-related factors impact your **willingness to perform** hourly (Q1) neuroassessments:

|                                                                | 1 = Much <u>less</u><br>willing | 2 = Slightly <u>less</u><br>willing | 3 = No change         | 4 = Slightly <u>more</u><br>willing | 5 = Much <u>more</u><br>willing |
|----------------------------------------------------------------|---------------------------------|-------------------------------------|-----------------------|-------------------------------------|---------------------------------|
| Patient is old (>65 years old).                                | <input type="radio"/>           | <input type="radio"/>               | <input type="radio"/> | <input type="radio"/>               | <input type="radio"/>           |
| I don't speak the patient's primary language.                  | <input type="radio"/>           | <input type="radio"/>               | <input type="radio"/> | <input type="radio"/>               | <input type="radio"/>           |
| Patient scores positive on delirium assessment (e.g. CAM-ICU). | <input type="radio"/>           | <input type="radio"/>               | <input type="radio"/> | <input type="radio"/>               | <input type="radio"/>           |
| Patient is aphasic.                                            | <input type="radio"/>           | <input type="radio"/>               | <input type="radio"/> | <input type="radio"/>               | <input type="radio"/>           |
| Patient is physically or verbally aggressive.                  | <input type="radio"/>           | <input type="radio"/>               | <input type="radio"/> | <input type="radio"/>               | <input type="radio"/>           |
| Patient appears to be sleeping/resting comfortably.            | <input type="radio"/>           | <input type="radio"/>               | <input type="radio"/> | <input type="radio"/>               | <input type="radio"/>           |
| The patient is non-compliant or expresses annoyance.           | <input type="radio"/>           | <input type="radio"/>               | <input type="radio"/> | <input type="radio"/>               | <input type="radio"/>           |
| The patient is familiar to me.                                 | <input type="radio"/>           | <input type="radio"/>               | <input type="radio"/> | <input type="radio"/>               | <input type="radio"/>           |



## Hourly Neuroassessments in the Intensive Care Unit

\* 26. Please indicate the degree to which you agree or disagree with the following statements on a scale from 1 (strongly disagree) to 5 (strongly agree):

|                                                                                                                                                       | 1 = Strongly Disagree | 2 = Disagree          | 3 = Neither Agree nor Disagree | 4 = Agree             | 5 = Strongly Agree    |
|-------------------------------------------------------------------------------------------------------------------------------------------------------|-----------------------|-----------------------|--------------------------------|-----------------------|-----------------------|
| Guidelines outlining care for acutely brain injured patients recommend "frequent neuroassessments". I interpret this to mean hourly neuroassessments. | <input type="radio"/> | <input type="radio"/> | <input type="radio"/>          | <input type="radio"/> | <input type="radio"/> |
| It is important for Guideline recommendations to specify a <i>frequency</i> for neuroassessments following acute brain injury.                        | <input type="radio"/> | <input type="radio"/> | <input type="radio"/>          | <input type="radio"/> | <input type="radio"/> |
| It is important for Guideline recommendations to suggest a <i>duration</i> for frequent neuroassessments following acute brain injury.                | <input type="radio"/> | <input type="radio"/> | <input type="radio"/>          | <input type="radio"/> | <input type="radio"/> |
| Hourly neuroassessments are <i>valuable</i> in the care of patients with acute brain injury.                                                          | <input type="radio"/> | <input type="radio"/> | <input type="radio"/>          | <input type="radio"/> | <input type="radio"/> |
| Hourly neuroassessments are <i>necessary</i> for patients with acute brain injury.                                                                    | <input type="radio"/> | <input type="radio"/> | <input type="radio"/>          | <input type="radio"/> | <input type="radio"/> |
| Hourly neuroassessments can be detrimental to patients with acute brain injury.                                                                       | <input type="radio"/> | <input type="radio"/> | <input type="radio"/>          | <input type="radio"/> | <input type="radio"/> |
| There should be a maximum amount of time that someone is continuously monitored with hourly neuroassessments.                                         | <input type="radio"/> | <input type="radio"/> | <input type="radio"/>          | <input type="radio"/> | <input type="radio"/> |
| I am comfortable spacing neuroassessments less frequently than hourly following acute brain injury.                                                   | <input type="radio"/> | <input type="radio"/> | <input type="radio"/>          | <input type="radio"/> | <input type="radio"/> |

1 = Strongly  
Disagree

2 = Disagree

3 = Neither Agree  
nor Disagree

4 = Agree

5 = Strongly Agree

If I had another way to monitor my patients' neurological status continuously following acute brain injury, I would not order hourly neuroassessments.

If I had acute brain injury, I would want hourly neuroassessments performed on me for fewer than 24 hours.

\* 27. How frequently do you think the majority of patients with acute brain injury should receive neuroassessments?

Every 30 minutes

Every 4 hours (Q4)

Every hour (Q1)

Every 6 hours (Q6)

Every 2 hours (Q2)

Less frequently than every 6 hours

Every 3 hours (Q3)

28. Please leave any additional comments below:

## Hourly Neuroassessments in the Intensive Care Unit

29. Would you like to participate in a raffle for an Amazon gift card?

If yes, please enter your email address below. This email address will be stored for the purposes of the raffle only, and once the prizes have been awarded, all email addresses will be deleted.

If no, you can skip this question to end your survey.
